# Supplementary material for: Attitudes toward statistics in medical postgraduates: measuring, evaluating and monitoring
Source: PubMed Central journal article supplement (PMC3533942; doi:10.1186/1472-6920-12-117), 2012-11-23

15/10/2012

To whom it may concern,

Re: "Attitudes toward statistics in medical postgraduates:  
measuring, evaluating and monitoring"

By Haixia Su (Department of Epidemiology and the Ministry of Education Key Lab of Hazard Assessment and Control in Special Operational Environment, School of Public Health, Fourth Military Medical University, Changle West Road 169#, Xi'an, Shaanxi, 710032, China.)

This is to confirm that this text has been edited by Thomas Laage (MD), an editor working for Liwen Bianji (Edanz Group China).

Sincerely yours,



Benjamin Shaw  
Global and China Director  
Liwen Bianji (Edanz Group China)

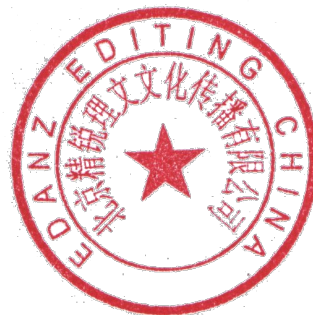

Supplement: 1472-6920-12-117-S1.pdf [file 1472-6920-12-117-S1.pdf]
